# Supplementary material for: Influenza dell' 1-Mcp sulla conservazione dei frutti
Source: Hindawi journal article supplement (doi:10.1155/2021/9993240), 2007-01-01
Supplement: f1 [file 9993240.f1.zip]

Table S2 PCR primer sequences for Drp1 and GAPDH genes

| Target gene | Primer sequence              |                              |
|-------------|------------------------------|------------------------------|
|             | Sense                        | Antisense                    |
| Drp1        | 5'-GGTGGGGTTGGAGATGGTGTT-3   | 5'-CGCTGTTCCCGAGCAGATAGTT-3  |
| GAPDH       | 5'-GTGAAGGTCGGAGTCAACGGAT-3' | 5'-CCTGGAAGATGGTGATGGGATT-3' |
