# Supplementary material for: Influenza dell' 1-Mcp sulla conservazione dei frutti
Source: Hindawi journal article supplement (doi:10.1155/2021/9993240), 2007-01-01
Supplement: f1 [file 9993240.f1.zip]

Table S1 The sequences of NRF2 siRNA duplexes and negative control

| siRNA            | Sequence of siRNA            |                                |
|------------------|------------------------------|--------------------------------|
|                  | Forward                      | Reverse                        |
| 1#               | 5'-GGUUGAGACUACCAUGG UUTT-3' | 5'-AACCAUGGUAGUCUCAACCTT -3'   |
| 2#               | 5'-GACAGAAGUUGAC AAUUAUTT-3' | 5'-AUAAUUGUCAACUUCUGUCTT -3'   |
| 3#               | 5'-CCAGAA CACUCAGUGGAAUTT-3' | 5' -AUUCCACUGAGUGUU CUGGTT -3' |
| Negative control | 5'-UUCUCCGAACGUGUCACGUTT -3' | 5'-ACGUGACACGUUCGGAGAATT -3'   |
