# Supplementary figures and images for: Influenza dell' 1-Mcp sulla conservazione dei frutti
Source: Hindawi journal article supplement (doi:10.1155/2021/9993240), 2007-01-01

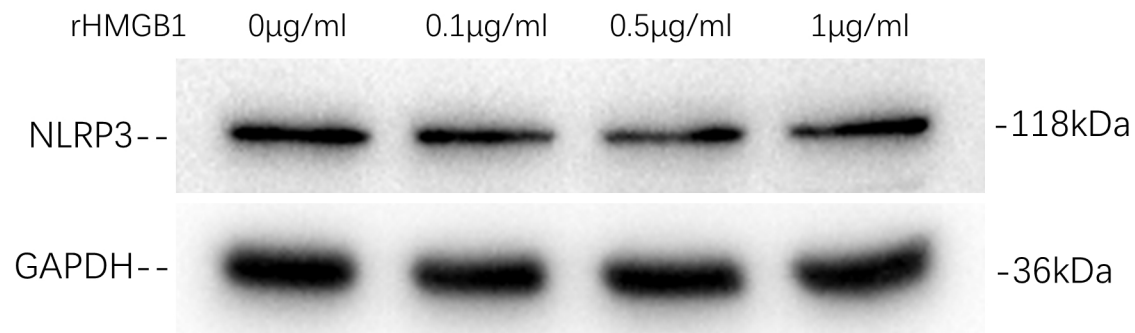

(a)

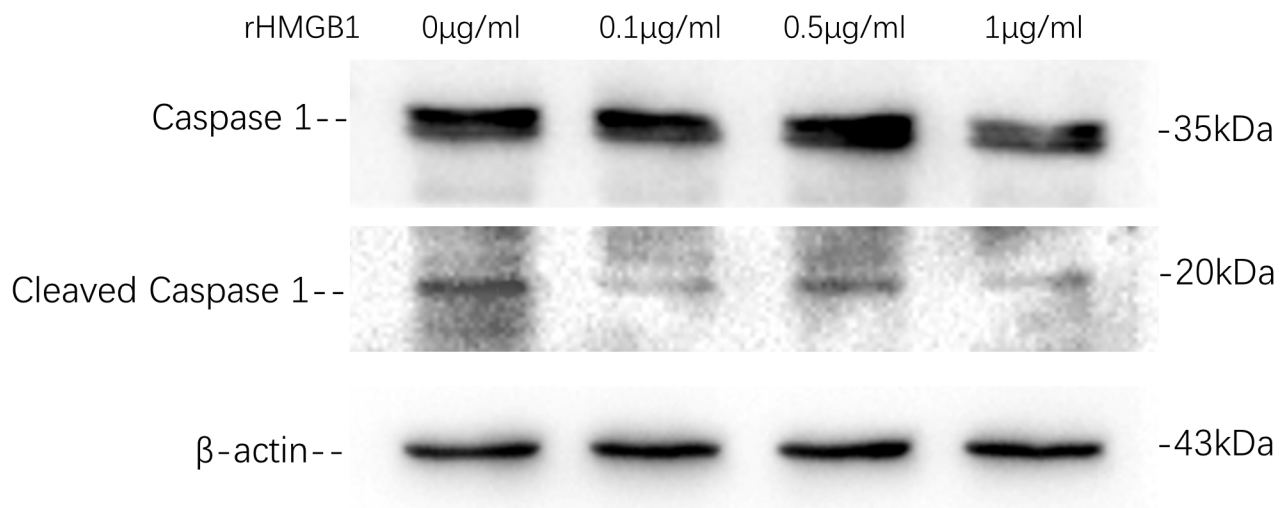

(b)

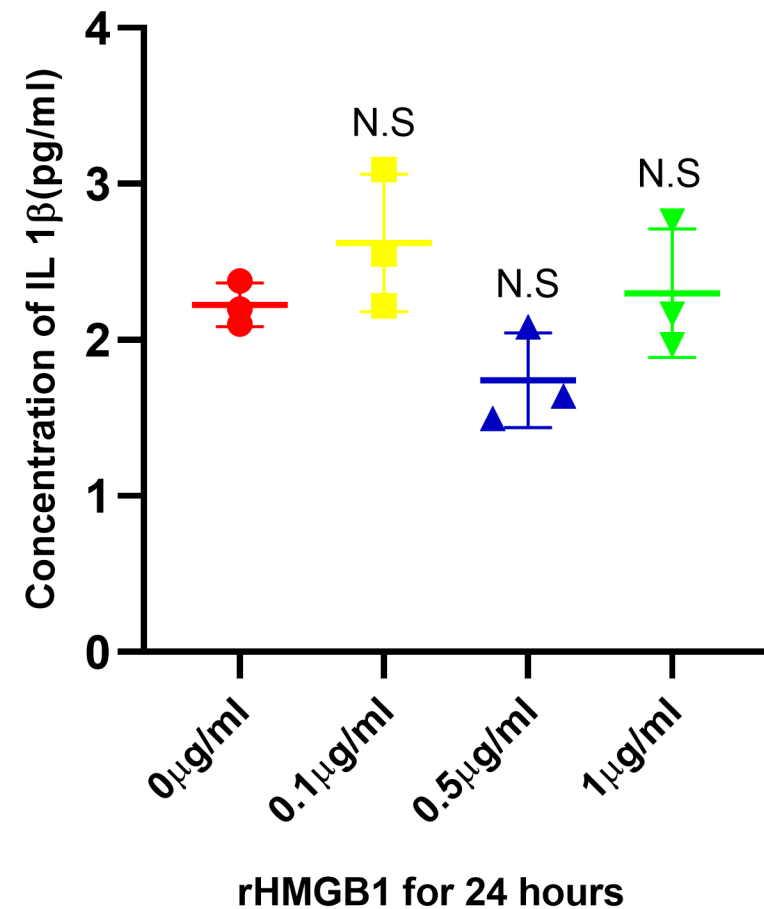

(c)

Supplement: f2 [file 9993240.f2.zip]

CD31

Hoechst

Merge

(a)

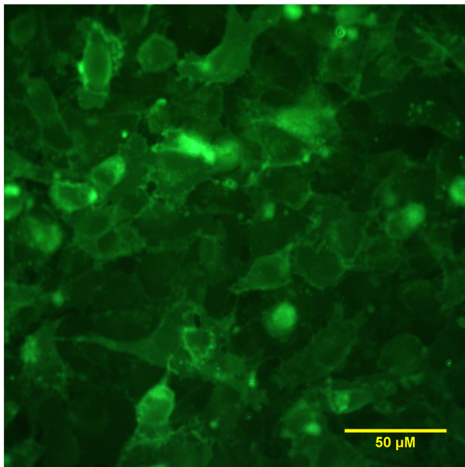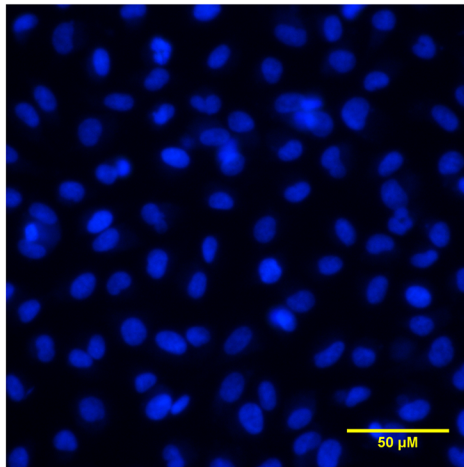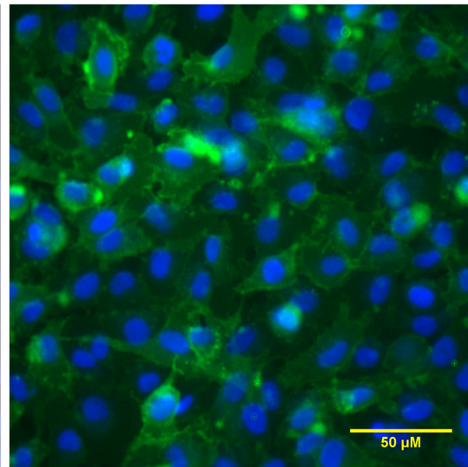

vWF

Hoechst

Merge

(b)

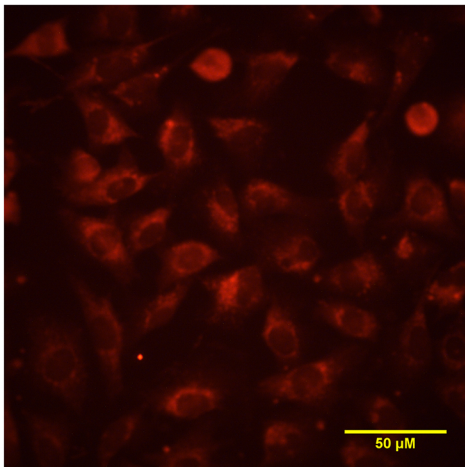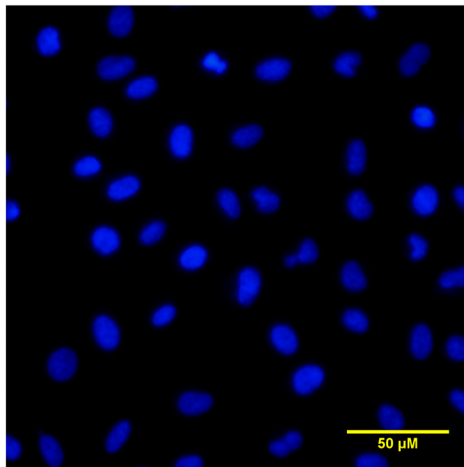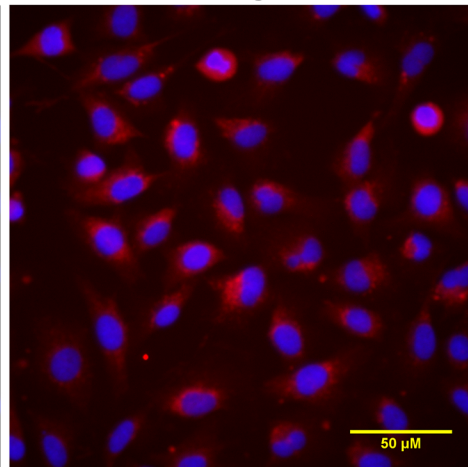

Supplement: f2 [file 9993240.f2.zip]
